# Supplementary material for: Hydrocarbonsadsorption on templated mesoporous materials: effect of the pore size, geometry and surface chemistry
Source: Royal Society of Chemistry journal article supplement (doi:10.1039/c0nj00614a), 2010-11-08
Supplement: c0nj00614a.pdf [file c0nj00614a.pdf]

**Manuscript number:** c0nj00614a*Hydrocarbons adsorption on templated mesoporous materials: effect of the pore size, geometry and surface chemistry*

Patrícia A. Russo, M. Manuela L. Ribeiro Carrott and Peter J. M. Carrott

**Electronic Supplementary Information****Table S1** Pore volume of the mesoporous samples obtained from the analysis, by the  $\alpha_s$  method, of the mesitylene (mes), toluene (tol), methylcyclohexane (mch), neopentane (neop) and n-pentane (n-pent) adsorption isotherms.

| Sample          | $V_p / \text{cm}^3 \text{g}^{-1}$ |      |      |      |        |
|-----------------|-----------------------------------|------|------|------|--------|
|                 | mes                               | tol  | mch  | neop | n-pent |
| C14-MCM-41      | 0.59                              | 0.59 | 0.58 | 0.58 | 0.59   |
| C16-MCM-41      | 0.70                              | 0.71 | 0.71 | 0.71 | 0.71   |
| C18-MCM-41      | 0.81                              | 0.81 | 0.81 | 0.81 | 0.81   |
| MCM-48          | 0.87                              | 0.88 | 0.88 | 0.87 | 0.87   |
| SBA-15          | 0.78                              | 0.79 | 0.78 | 0.78 | 0.78   |
| SBA-15-C        | 0.61                              | 0.61 | 0.61 | 0.61 | 0.61   |
| SBA-16          | 0.43                              | 0.43 | 0.43 | 0.43 | 0.43   |
| LPC             | 0.98                              | 0.97 | 0.97 | 0.97 | 0.98   |
| MCF             | 2.02                              | 2.03 | 2.01 | 2.03 | 2.03   |
| C16-MCM-41-CMTS | 0.60                              | 0.61 | 0.60 | 0.61 | 0.61   |
| C18-MCM-41-CMTS | 0.65                              | 0.66 | 0.65 | 0.65 | 0.66   |
| SBA-15-CMTS     | 0.61                              | 0.62 | 0.61 | 0.62 | 0.61   |
| C16-HSB         | 0.51                              | 0.52 | 0.52 | 0.52 | 0.51   |
| CMK-3           | 0.86                              | 0.90 | 0.90 | 0.92 | 0.90   |
